# Supplementary material for: A highly selective fluorescent probe for real-time imaging of bacterial NAT2 and high-throughput screening of natural inhibitors for tuberculosis therapy
Source: Royal Society of Chemistry journal article supplement (doi:10.1039/c8qm00514a), 2018-11-12
Supplement: c8qm00514a1.pdf [file c8qm00514a1.pdf]

## Supplementary information

### **A highly selective fluorescent probe for real-time imaging of bacterial NAT2 and high-throughput screening natural inhibitors to therapy tuberculosis**

Yinzhu Jin,<sup>#a b</sup> Zhenhao Tian,<sup>#c</sup> Xiangge Tian,<sup>#a</sup> Lei Feng,<sup>\*a b</sup> Jingnan Cui,<sup>c</sup> and  
Xiaochi Ma<sup>\*a</sup>

<sup>a</sup> College of Pharmacy, Academy of Integrative Medicine, Dalian Medical University,  
Dalian 116044, China.

<sup>b</sup> Institute of Functional Materials and Molecular Imaging, College of Emergency and  
Trauma, Hainan Medical University, Haikou, 571199, China;

<sup>c</sup> State Key Laboratory of Fine Chemicals, Dalian University of Technology, Dalian  
116024, China

<sup>#</sup> These authors equally contributed to this work.

<sup>\*</sup> Corresponding author: Xiaochi Ma and Lei Feng

**E-mail:** maxc1978@163.com (Xiaochi Ma); leifeng@mail.dlut.edu.cn (Lei Feng);

Tel: +86-411-86110419

## **Table of Contents**

|                                                                             |              |
|-----------------------------------------------------------------------------|--------------|
| <b>Synthesis and structural characterization of NRHB and ARHB.....</b>      | <b>S3-S4</b> |
| <b>HPLC chromatograms of ARHB upon addition of NAT2<br/>.....</b>           | <b>S5</b>    |
| <b>The mass spectrum of NA-ARHB product of ARHB by NAT2<br/>.....</b>       | <b>S5</b>    |
| <b>The linear relationship between fluorescence intensity and time.....</b> | <b>S5</b>    |
| <b>Fluorescence background of different bacterial strains .....</b>         | <b>S6</b>    |
| <b>The structure of 16 natural compounds.....</b>                           | <b>S7</b>    |

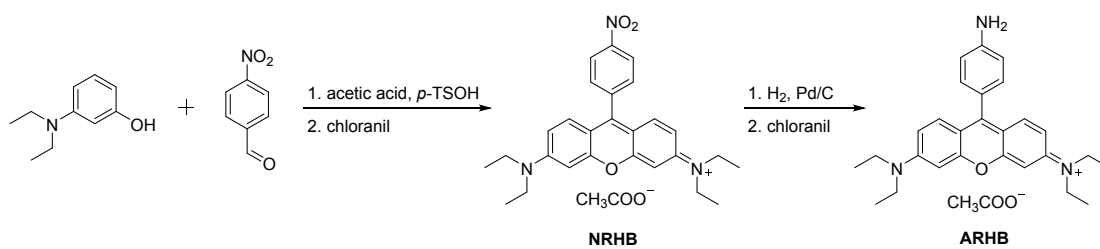

**Figure S1.** Synthesis of **ARHB**.

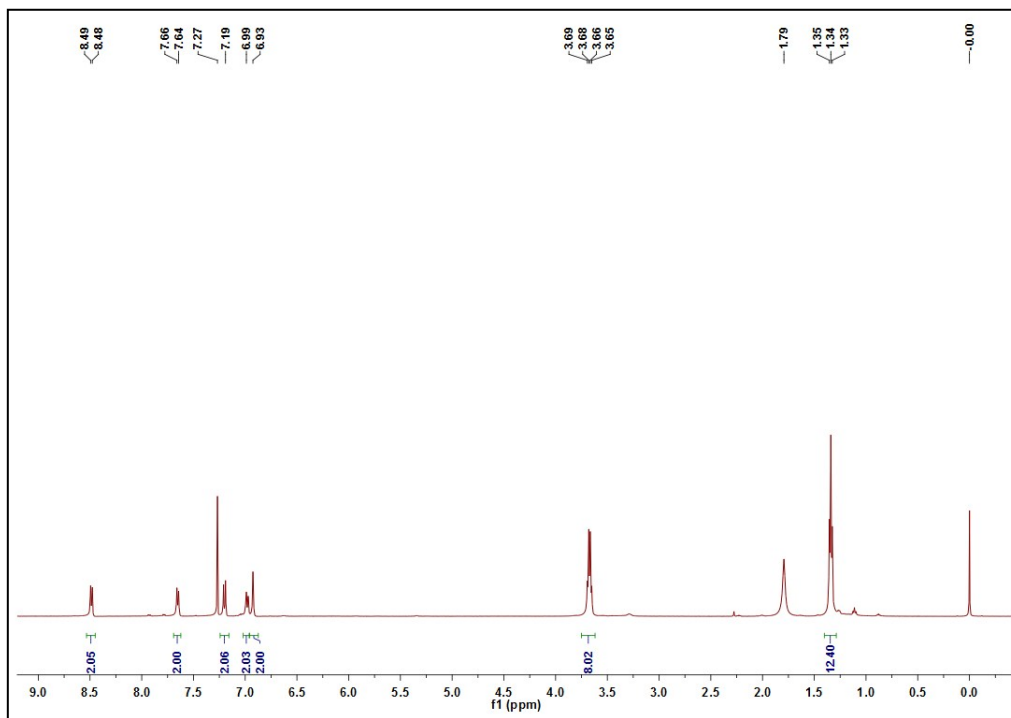

**Figure S2.** <sup>1</sup>H NMR spectrum of **NRHB** in CDCl<sub>3</sub>.

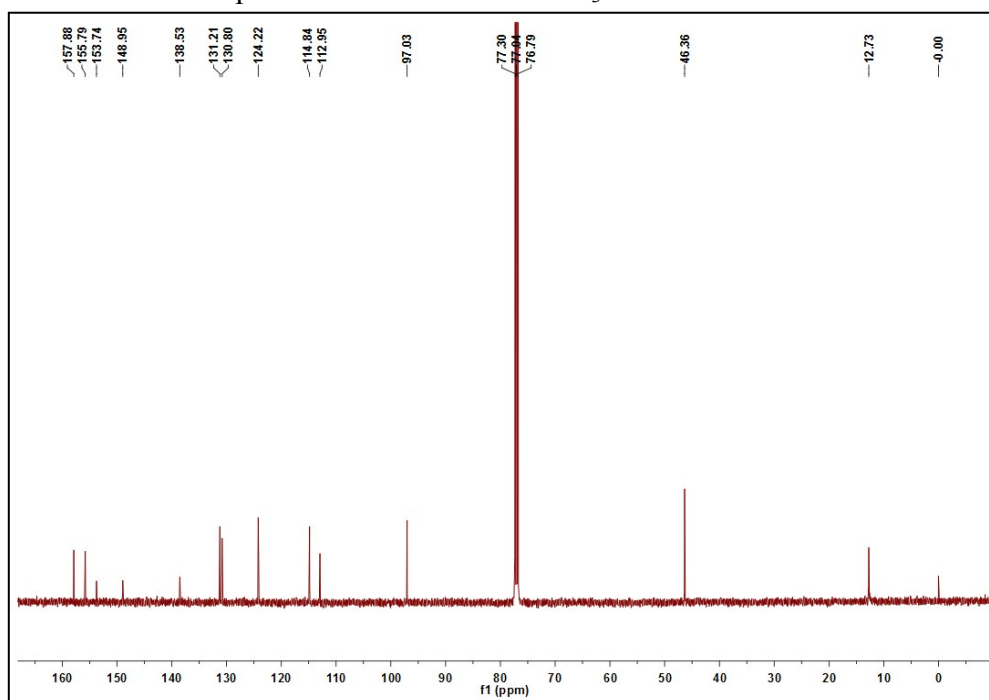

**Figure S3.** <sup>13</sup>C NMR spectrum of **NRHB** in CDCl<sub>3</sub>.

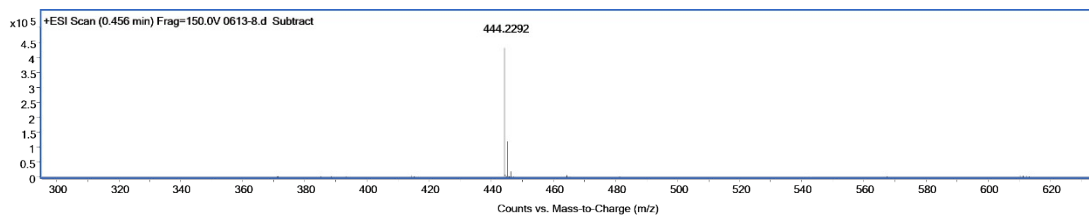

Figure S4. HRMS of NRHB.

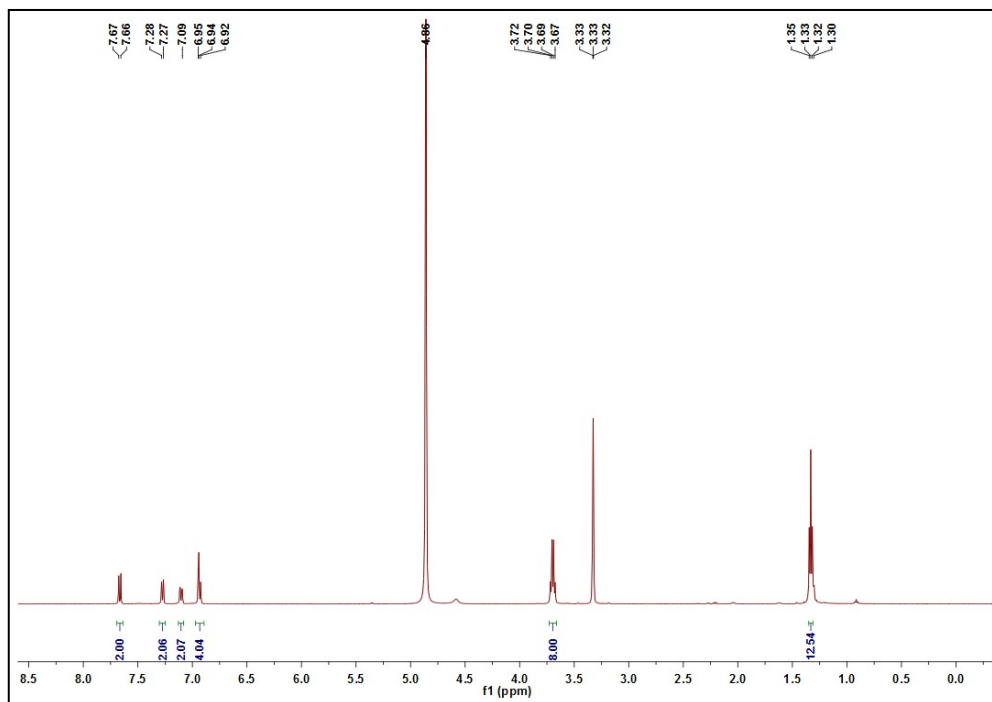

Figure S5. <sup>1</sup>H NMR spectrum of ARHB in MeOD.

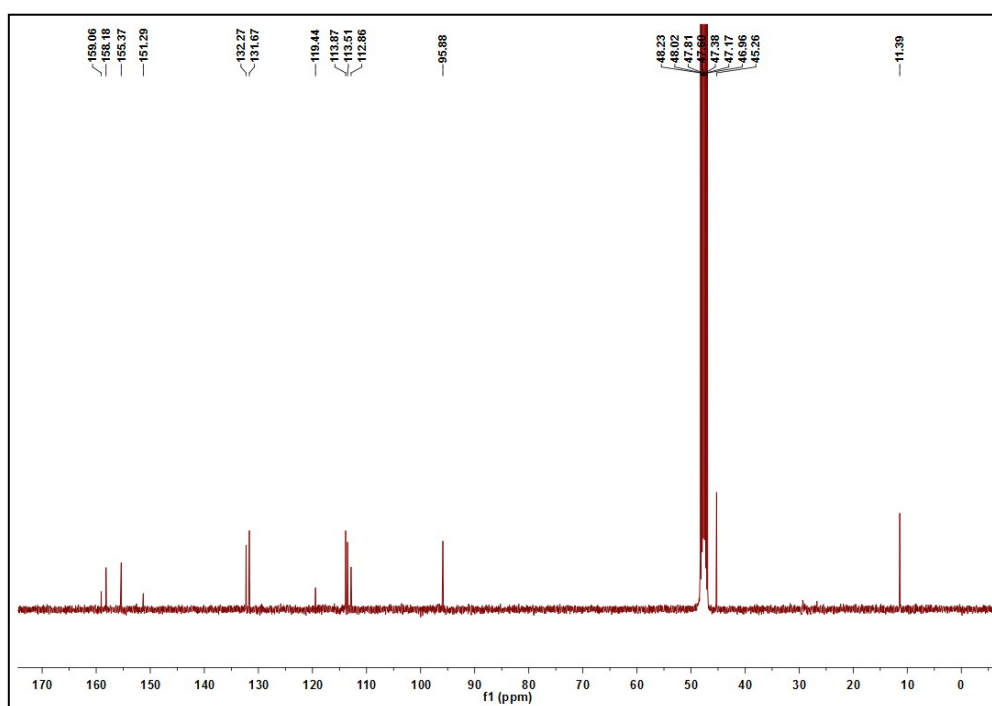

Figure S6. <sup>13</sup>C NMR spectrum of ARHB in MeOD.

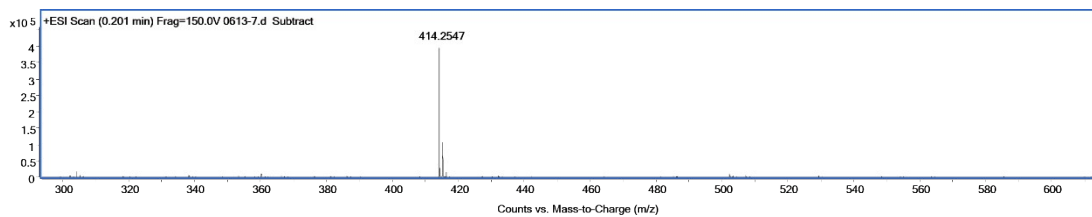

**Figure S7.** HRMS of ARHB.

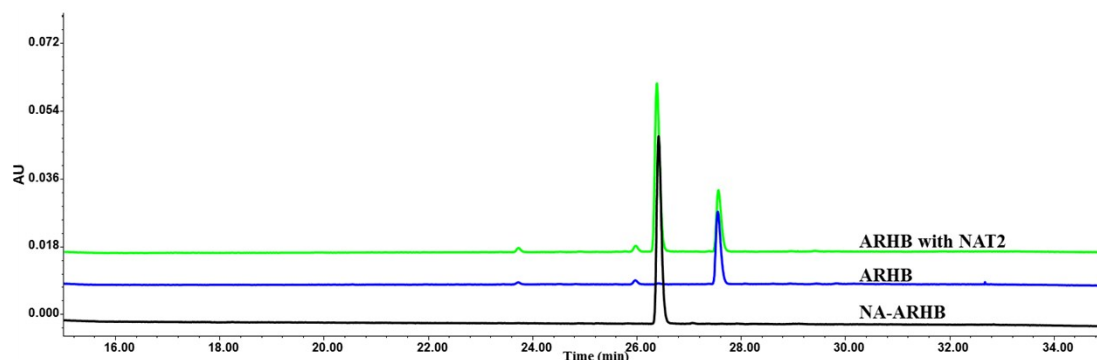

**Figure S8.** Representative HPLC chromatograms of ARHB (50 μM) incubation with NAT2 at 37 °C, UV detector was set at 580 nm.

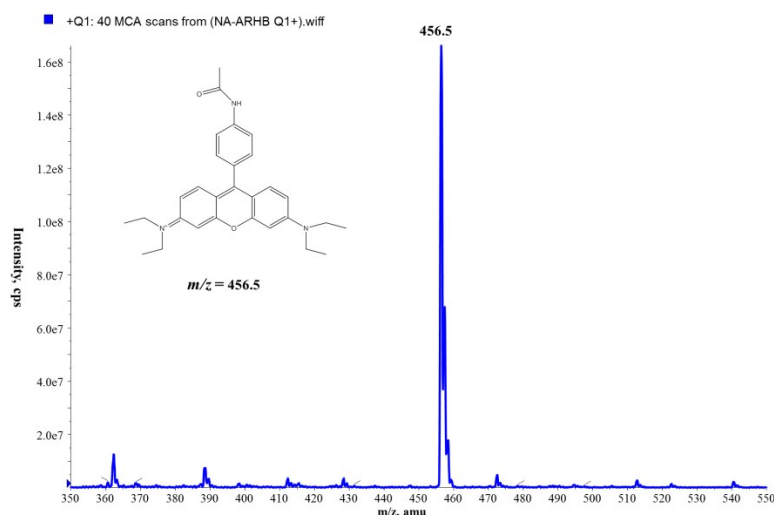

**Figure S9.** The mass spectrum of NA-ARHB as a reaction product of ARHB by NAT2.

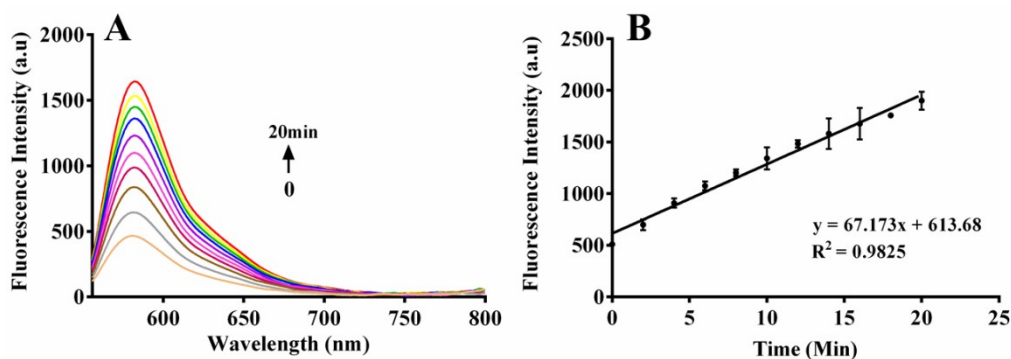

**Figure S10.** The linear relationship between fluorescence intensity and time (0 - 20 min).  $\lambda_{ex} = 530$  nm.

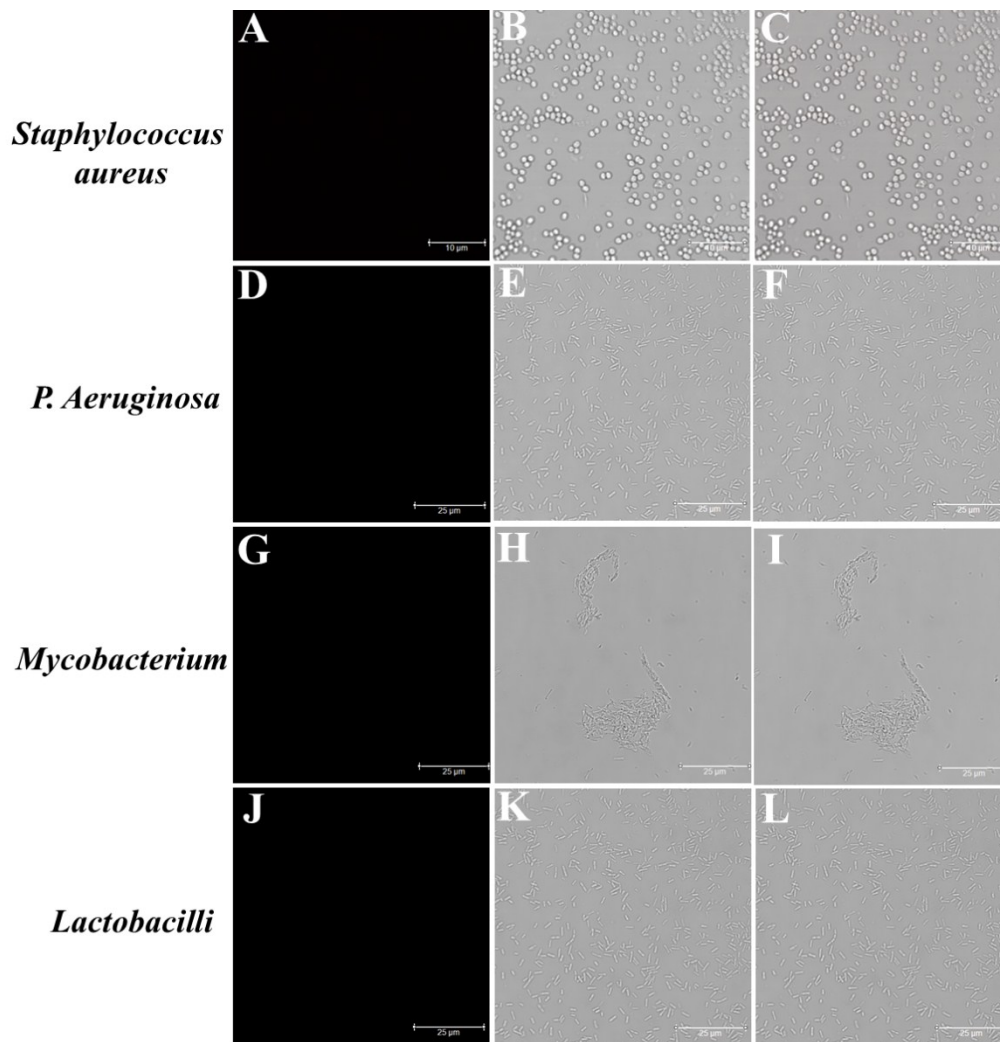

**Figure S11.** Fluorescence background of different bacterial strains. (A, D, G, J) Fluorescence fields; (B, E, H, K) Bright fields; (C, F, I, L) the merge of fluorescence and bright fields.

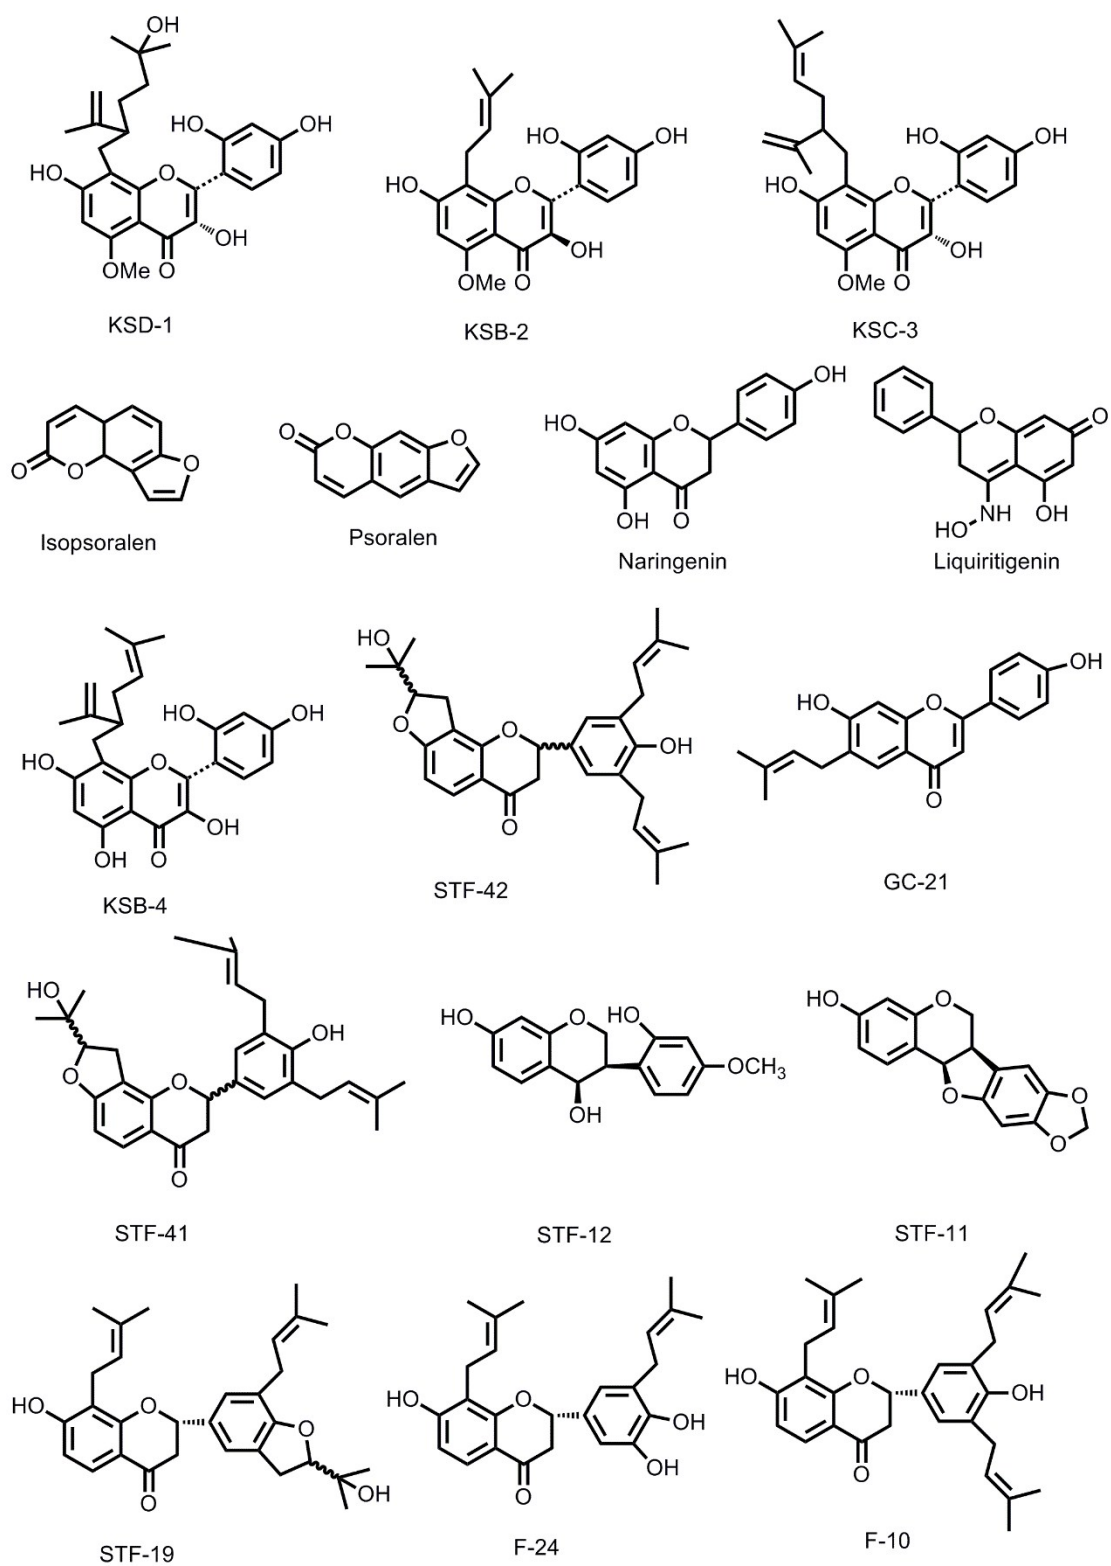

**Figure S12.** The structure of 16 natural compounds.
